# Supplementary material
Source: publisher figshare collection journal article supplement (https://frontiersin.figshare.com/ndownloader/files/21884301)
Supplement: Supplementary file 1 [file 21884301]

## Sheet: TableS1
Table S1. Sample, extraction, amplification and sequencing information.
Reference	Sample name	Sample ID	Organism	Geographical location	Date	Collection	Niche	Powder (mg)	#PCR Cycles	Seq. mode	#Reads	#Retained
This study	Tx100	CGG_1_022095	unidentified	Taimyr Peninsula, Russia	>100 kyr1	Swedish Museum of Natural History	marine	1095	29	81 PE	6747556	653177
This study	Tx101A	CGG_1_022096	Mytilus edulis	Taimyr Peninsula, Russia	>100 kyr1	Swedish Museum of Natural History	marine	352	26	81 PE	18369198	12706997
This study	Tx103	CGG_1_022098	Portlandia arctica	Taimyr Peninsula, Russia	>100 kyr1	Swedish Museum of Natural History	marine	174	22	81 PE	36524098	19314607
This study	quahog1B	CGG_1_018586	Arctica islandica	Unknown, Unknown	1722 C.E.	Natural History Museum of Denmark, University of Copenhagen	marine	1144	24	81 PE	30050698	14592438
Der Sarkissian et al., 2017	quahog2	CGG_1_018587	Arctica islandica	sine loc., Denmark	1804 C.E.	Natural History Museum of Denmark, University of Copenhagen	marine	395	21	81SE	18871776	18494781
This study	vid	CGG_1_021429	Arctica islandica	Vidhoy, Faroe Islands	1885 C.E.	Natural History Museum of Denmark, University of Copenhagen	marine	961	x	x	x	x
Der Sarkissian et al., 2017	hel	CGG_1_018590	Arctica islandica	Hellebæk, Denmark	1886 C.E.	Natural History Museum of Denmark, University of Copenhagen	marine	811	21	81SE	13089376	12674074
This study	onuA	CGG_1_021412	Arctica islandica	Önundarfjordur, Iceland	1893 C.E.	Natural History Museum of Denmark, University of Copenhagen	marine	1629	23	81 PE	13074594	6446403
This study	bakA	CGG_1_021415	Arctica islandica	Bakkaflöi, Iceland	1900 C.E.	Natural History Museum of Denmark, University of Copenhagen	marine	524	26	81 PE	56559606	30000220
This study	ves4A	CGG_1_021414	Arctica islandica	Westman Islands, Iceland	1900 C.E.	Natural History Museum of Denmark, University of Copenhagen	marine	2843	23	81 PE	17287016	7073491
This study	fun1	CGG_1_021430	Arctica islandica	Fundingfjord, Faroe Islands	1901 C.E.	Natural History Museum of Denmark, University of Copenhagen	marine	462	x	x	x	x
Der Sarkissian et al., 2017	ves	CGG_1_018585	Arctica islandica	Vestmanna, Faroe Islands	1901 C.E.	Natural History Museum of Denmark, University of Copenhagen	marine	1485	14	81SE	8264494	8153984
This study	vesC	CGG_1_018585	Arctica islandica	Vestmannehavn, Faroe Islands	1901 C.E.	Natural History Museum of Denmark, University of Copenhagen	marine	1602	x	x	x	x
This study	axa	CGG_1_021418	Arctica islandica	Axarfjord, Iceland	1903 C.E.	Natural History Museum of Denmark, University of Copenhagen	marine	700	x	x	x	x
This study	flaA	CGG_1_021419	Arctica islandica	Flatey, Iceland	1903 C.E.	Natural History Museum of Denmark, University of Copenhagen	marine	1157	23	81 PE	4591784	2477750
This study	nfl	CGG_1_021410	Arctica islandica	Flatey, Iceland	1903 C.E.	Natural History Museum of Denmark, University of Copenhagen	marine	473	x	x	x	x
This study	ran1	CGG_1_021416	Arctica islandica	Vidarvik, Iceland	1903 C.E.	Natural History Museum of Denmark, University of Copenhagen	marine	2101	24	81 PE	49501816	27291420
This study	sne	CGG_1_021425	Arctica islandica	Snekkersten, Denmark	1903 C.E.	Natural History Museum of Denmark, University of Copenhagen	marine	1221	x	x	x	x
This study	hel2A	CGG_1_021426	Arctica islandica	Hellebæk, Denmark	1910 C.E.	Natural History Museum of Denmark, University of Copenhagen	marine	1860	24	81 PE	34880594	19210163
This study	ore1	CGG_1_021427	Arctica islandica	Øresund, Denmark	1926 C.E.	Natural History Museum of Denmark, University of Copenhagen	marine	870	x	x	x	x
This study	bai1	CGG_1_021420	Arctica islandica	Bair-Isafjardhardyr, Iceland	1933 C.E.	Natural History Museum of Denmark, University of Copenhagen	marine	961	x	x	x	x
This study	bai2	CGG_1_021421	Arctica islandica	Bair-Isafjardhardyr, Iceland	1933 C.E.	Natural History Museum of Denmark, University of Copenhagen	marine	2150	24	81 PE	28668834	13621176
This study	ore2A	CGG_1_021428	Arctica islandica	Øresund, Denmark	1946 C.E.	Natural History Museum of Denmark, University of Copenhagen	marine	904	23	81 PE	47382554	26878824
This study	gun2	CGG_1_021423	Arctica islandica	Gunnolfsvik, Iceland	1950 C.E.	Natural History Museum of Denmark, University of Copenhagen	marine	1492	x	x	x	x
This study	pol1	CGG_1_022608	Cernuella virgata	Pola, Croatia	1928 C.E.	Natural History Museum of Denmark, University of Copenhagen	terrestrial	112	x	x	x	x
This study	tri1	CGG_1_022607	Cernuella virgata	Triest, Italy	1928 C.E.	Natural History Museum of Denmark, University of Copenhagen	terrestrial	213	x	x	x	x
Der Sarkissian et al., 2017	BRE4	CGG_1_017735	Crassostrea gigas	Brest, France	1990 C.E.	LEMAR, Université de Bretagne Occidentale	marine	371	x	x	x	x
Der Sarkissian et al., 2017	SAT	CGG_1_017734	Crassostrea gigas	Landéda, France	2000 C.E.	LEMAR, Université de Bretagne Occidentale	marine	207	x	x	x	x
Der Sarkissian et al., 2017	BRE5p	CGG_1_017736	Crassostrea sp	Brest, France	2006 C.E.	LEMAR, Université de Bretagne Occidentale	marine	613	12, 13	101SE	27645919	27144851
This study	ches2	CGG_1_022076	Crassostrea virginica	Chesapeake Bay, USA	1430-1520 C.E. (Rick et al. 2016)	National Museum of Natural History, Smithsonian Institution	marine	2990	x	x	x	x
This study	ches1a	CGG_1_022078	Crassostrea virginica	Chesapeake Bay, USA	1820-1900 C.E. (Rick et al., 2016)	National Museum of Natural History, Smithsonian Institution	marine	609	x	x	x	x
This study	ches3	CGG_1_022075	Crassostrea virginica	Chesapeake Bay, USA	550-680 C.E. (Rick et al., 2016)	National Museum of Natural History, Smithsonian Institution	marine	1579	x	x	x	x
This study	cop2	CGG_1_022610	Dreissena polymorpha	Copenhagen, Denmark	1907 C.E.	Natural History Museum of Denmark, University of Copenhagen	freshwater	827	x	x	x	x
This study	cop1	CGG_1_022609	Dreissena polymorpha	Copenhagen, Denmark	1925 C.E.	Natural History Museum of Denmark, University of Copenhagen	freshwater	441	17	81 PE	11970824	11112715
This study	tys1	CGG_1_022611	Dreissena polymorpha	Tystrup Lake, Denmark	1941 C.E.	Natural History Museum of Denmark, University of Copenhagen	freshwater	261	14	81 PE	15009888	7731530
This study	cal5	CGG_1_022616	Haliotis cracherodii	San Miguel Island, USA	1630-1800 C.E. (Rick et al. 2007)	National Museum of Natural History, Smithsonian Institution	marine	739	x	x	x	x
This study	cal3	CGG_1_022602	Haliotis corrugata	Pacific, USA	Unknown	Natural History Museum of Denmark, University of Copenhagen	marine	872	x	x	x	x
This study	cal4	CGG_1_022603	Haliotis cracherodii	Pacific, USA	1946 C.E.	Natural History Museum of Denmark, University of Copenhagen	marine	1303	17	81 PE	19342648	12741676
This study	cal2	CGG_1_022601	Haliotis fulgens	Pacific, USA	1848 C.E.	Natural History Museum of Denmark, University of Copenhagen	marine	635	x	x	x	x
This study	cal1	CGG_1_022600	Haliotis rufescens	Pacific, USA	Unknown	Natural History Museum of Denmark, University of Copenhagen	marine	2948	20	81 PE	19291324	11078316
Der Sarkissian et al., 2017	med	CGG_1_018582	Haliotis tuberculata	Mediterranean Sea, UK	1804 C.E.	Natural History Museum of Denmark, University of Copenhagen	marine	1296	16	81SE	481087	475317
Der Sarkissian et al., 2017	gue	CGG_1_018581	Haliotis tuberculata	Guernesey Island, UK	1832 C.E.	Natural History Museum of Denmark, University of Copenhagen	marine	1480	12	81SE	9823899	9699275
Der Sarkissian et al., 2017	BRE1	CGG_1_017726	Haliotis tuberculata	Brest, France	2003 C.E.	LEMAR, Université de Bretagne Occidentale	marine	413	10	101SE	7506486	7447143
Der Sarkissian et al., 2017	BRE3p	CGG_1_017728	Haliotis tuberculata	Brest, France	2003 C.E.	LEMAR, Université de Bretagne Occidentale	marine	1135	9, 8	101SE	18933799	18798262
Der Sarkissian et al., 2017	BRE2	CGG_1_017727	Haliotis tuberculata	Brest, France	2005 C.E.	LEMAR, Université de Bretagne Occidentale	marine	440	15	101SE	10795266	10739804
This study	lag1	CGG_1_022606	Lottia gigantea	Laguna Beach, USA	1940 C.E.	Natural History Museum of Denmark, University of Copenhagen	marine	658	x	x	x	x
This study	nyk1	CGG_1_022604	Lymnaea stagnalis	Nykøbing, Denmark	1906 C.E.	Natural History Museum of Denmark, University of Copenhagen	freshwater	246	19	81 PE	29277948	14300382
This study	sil1	CGG_1_022605	Lymnaea stagnalis	Silkeborg, Denmark	1915 C.E.	Natural History Museum of Denmark, University of Copenhagen	freshwater	694	x	x	x	x
This study	hol1	CGG_1_022614	Margaritifera margaritifera	The Netherlands, The Netherlands	1828 C.E.	Natural History Museum of Denmark, University of Copenhagen	freshwater	815	x	x	x	x
This study	var1	CGG_1_022615	Margaritifera margaritifera	Varde Aa, Denmark	1895 C.E.	Natural History Museum of Denmark, University of Copenhagen	freshwater	555	x	x	x	x
This study	tyn1	CGG_1_022613	Margaritifera margaritifera	Northumberland, UK	1977 C.E.	Natural History Museum of Denmark, University of Copenhagen	freshwater	500	x	x	x	x
This study	cal7	CGG_1_022617	Mytilus californianus	San Miguel Island, USA	1630-1800 C..E. (Rick 2007)	Smithsonian collection	marine	1390	x	x	x	x
Der Sarkissian et al., 2017	mes	CGG_1_018583	Mytilus galloprovincialis	Messina, Italy	1866 C.E.	Natural History Museum of Denmark, University of Copenhagen	marine	921	x	x	x	x
Der Sarkissian et al., 2017	hav	CGG_1_018594	Mytilus sp.	Havnø, Denmark	~7,000 calibrated yr BP (Der Sarkissian, 2017). Ertebølle culture, site occupation (5,700-7,000 yr BP). Late Mesolithic layer: ~7,000 yr BP (Andersen, 2008)	Natural History Museum of Denmark, University of Copenhagen	marine	2591	20	81SE	11183672	10515059
This study	hav2C	CGG_1_018594	Mytilus sp.	Havnø, Denmark	~7,000 calibrated yr BP (Der Sarkissian, 2017). Ertebølle culture, site occupation (5,700-7,000 yr BP). Late Mesolithic layer: ~7,000 yr BP (Andersen, 2008)	Natural History Museum of Denmark, University of Copenhagen	marine	1730	x	x	x	x
Der Sarkissian et al., 2017	LEFB	CGG_1_017733	Pecten maximus	Le Faou, France	1995 C.E.	LEMAR, Université de Bretagne Occidentale	marine	349	15	101SE	11484012	11430195
Der Sarkissian et al., 2017	BERB	CGG_1_017731	Pecten maximus	Bergen, Norway	1997 C.E.	LEMAR, Université de Bretagne Occidentale	marine	148	x	x	x	x
Der Sarkissian et al., 2017	ROSB	CGG_1_017732	Pecten maximus	Roscanvel, France	1997 C.E.	LEMAR, Université de Bretagne Occidentale	marine	98	6	101SE	7724821	7686285
Der Sarkissian et al., 2017	REIB	CGG_1_017730	Pecten maximus	Ré Island, France	1999 C.E.	LEMAR, Université de Bretagne Occidentale	marine	122	x	x	x	x
Der Sarkissian et al., 2017	CHIB	CGG_1_017729	Argopecten sp.	Chile, Chile	2000 C.E.	LEMAR, Université de Bretagne Occidentale	marine	100	x	x	x	x
Der Sarkissian et al., 2017	auzay1B	CGG_1_017737	Ruditapes decussatus	Les Châtelliers du Vieil-Auzay, France	Middle Neolithic 6th millenium BP (Large & Birocheau 2004)	CReAAH, University Rennes 1	marine	4306	15	101SE	15240748	15030940
Der Sarkissian et al., 2017	auzay2B	CGG_1_017738	Ruditapes decussatus	Les Châtelliers du Vieil-Auzay, France	Middle Neolithic 6th millenium BP (Large & Birocheau 2004)	CReAAH, University Rennes 1	marine	5390	14	101SE	11095140	10913477
Der Sarkissian et al., 2017	auzay3B	CGG_1_017739	Ruditapes decussatus	Les Châtelliers du Vieil-Auzay, France	Middle Neolithic 6th millenium BP (Large & Birocheau 2004)	CReAAH, University Rennes 1	marine	2307	13	101SE	13565581	13414246
Der Sarkissian et al., 2017	auzay4B	CGG_1_017740	Ruditapes decussatus	Les Châtelliers du Vieil-Auzay, France	Middle Neolithic 6th millenium BP (Large & Birocheau 2004)	CReAAH, University Rennes 1	marine	2925	11	101SE	12191311	12008593
Der Sarkissian et al., 2017	gripB	CGG_1_017741	Ruditapes decussatus	La Gripperie-Saint-Symphorien, France	7th century C.E. (Gissinger 2011; Le Goff & Dupont 2015)	CReAAH, University Rennes 1	marine	6366	10	101SE	10555462	10484321
Der Sarkissian et al., 2017	lmc1B	CGG_1_017742	Ruditapes decussatus	La Maison Champlain-Brouage, France	16-17th century C.E. (Champagne et al., 2012)	CReAAH, University Rennes 1	marine	3574	9	101SE	12983981	12888532
Der Sarkissian et al., 2017	lmc2B	CGG_1_017743	Ruditapes decussatus	La Maison Champlain-Brouage, France	16-17th century C.E. (Champagne et al., 2012)	CReAAH, University Rennes 1	marine	2724	11	101SE	10911865	10811007
Der Sarkissian et al., 2017	lmc3B	CGG_1_017744	Ruditapes decussatus	La Maison Champlain-Brouage, France	16-17th century C.E. (Champagne et al., 2012)	CReAAH, University Rennes 1	marine	2943	10	101SE	17964100	17845554
Der Sarkissian et al., 2017	LAN1p	CGG_1_017718	Ruditapes philippinarum	Landéda, France	1983 C.E.	LEMAR, Université de Bretagne Occidentale	marine	126	10	101SE	10499178	10402596
Der Sarkissian et al., 2017	LAN2p	CGG_1_017719	Ruditapes philippinarum	Landéda, France	1983 C.E.	LEMAR, Université de Bretagne Occidentale	marine	400	11	101SE	13812143	13667939
Der Sarkissian et al., 2017	LAN3p	CGG_1_017720	Ruditapes philippinarum	Landéda, France	1983 C.E.	LEMAR, Université de Bretagne Occidentale	marine	153	6	101SE	7981394	7925697
Der Sarkissian et al., 2017	NEG	CGG_1_021200	Ruditapes philippinarum	Landéda, France	1988 C.E.	LEMAR, Université de Bretagne Occidentale	marine	153	12	98PE + 51SE	50373801	50694338
Der Sarkissian et al., 2017	POSp	CGG_1_021199	Ruditapes philippinarum	Landéda, France	1988 C.E.	LEMAR, Université de Bretagne Occidentale	marine	147	12	98PE + 51SE	36371525	33530237
Der Sarkissian et al., 2017	MURp	CGG_1_017725	Ruditapes philippinarum	Murano, Italy	1990 C.E.	LEMAR, Université de Bretagne Occidentale	marine	1744	8, 13	101SE, 81SE	9932924	9847558
Der Sarkissian et al., 2017	KORp	CGG_1_017722	Ruditapes philippinarum	Cheju, Korea	2003 C.E.	LEMAR, Université de Bretagne Occidentale	marine	147	10, 15, 7, 9	101SE	35083934	34501909
Der Sarkissian et al., 2017	SELp	CGG_1_017721	Ruditapes philippinarum	Seloy, Norway	2003 C.E.	LEMAR, Université de Bretagne Occidentale	marine	479	11	101SE	8455559	8373378
Der Sarkissian et al., 2017	AKKp	CGG_1_017723	Ruditapes philippinarum	Akkeshi, Japan	2012 C.E.	LEMAR, Université de Bretagne Occidentale	marine	139	11	101SE	9709393	9640133
Der Sarkissian et al., 2017	MATp	CGG_1_017724	Ruditapes philippinarum	Matsusaka, Japan	2012 C.E.	LEMAR, Université de Bretagne Occidentale	marine	372	14,17	101SE, 81SE	18091072	18001838
Der Sarkissian et al., 2017	nis	CGG_1_018935	Venerupis corrugata	Nissum Bredning, Denmark	1886 C.E.	Natural History Museum of Denmark, University of Copenhagen	marine	445	14	81SE	8386634	8301630
Der Sarkissian et al., 2017	thi	CGG_1_018936	Venerupis corrugata	Thisted Bredning, Denmark	1909 C.E.	Natural History Museum of Denmark, University of Copenhagen	marine	597	15	81SE	13947789	13868126
Der Sarkissian et al., 2017	EBC7	n/a	EBC for auzay1-4B, gripB, lmc1-3B	n/a	n/a	n/a	n/a	n/a	15	101SE	8914833	8653416
Der Sarkissian et al., 2017	EBC8	n/a	EBC for hav, gue, med, ves	n/a	n/a	n/a	n/a	n/a	24	81SE	7557184	3570529
Der Sarkissian et al., 2017	EBC9	n/a	EBC for quahog2, hel	n/a	n/a	n/a	n/a	n/a	24	81SE	9974348	3146625
Der Sarkissian et al., 2017	EBC11	n/a	EBC for nis, thi	n/a	n/a	n/a	n/a	n/a	23	81SE	9597406	8798083
Der Sarkissian et al., 2017	EBC12	n/a	EBC for MATp, MURp	n/a	n/a	n/a	n/a	n/a	29	81SE	106077	74324
This study	EBC15	n/a	EBC for Tx101A	n/a	n/a	n/a	n/a	n/a	35	81 PE	24687739	5769635
This study	EBC16	n/a	EBC for quahog1B	n/a	n/a	n/a	n/a	n/a	35	81 PE	42298558	5762695
This study	EBC17	n/a	EBC for hel2A, bai2	n/a	n/a	n/a	n/a	n/a	35	81 PE	9319754	1618926
This study	EBC19	n/a	EBC for Tx100, ran1	n/a	n/a	n/a	n/a	n/a	35	81 PE	21510020	1190080
This study	EBC20A	n/a	EBC for onuA, bakA, ves4A, flaA, ore2A	n/a	n/a	n/a	n/a	n/a	35	81 PE	8811074	5205747
This study	EBC21	n/a	EBC for Tx103	n/a	n/a	n/a	n/a	n/a	35	81 PE	39987184	2753748
This study	EBC23	n/a	EBC for cal1, nyk1	n/a	n/a	n/a	n/a	n/a	34	81 PE	44813648	14238807
This study	EBC24	n/a	EBC for cop1, tys1, cal4	n/a	n/a	n/a	n/a	n/a	34	81 PE	42467228	2634190
1Two age populations; 101-105 kyr (±9-12 kyr), n = 3, and 122-123 kyr (±15 kyr), n = 2 (Möller et al., 2019a, 2019b).
"x" indicates that libraries showed low concentration of DNA and were not selected for PCR amplification and sequencing.
"kyr", kilo year; "C.E.", Common Era; "yr BP", years Before Present
REFERENCES
Andersen SH (2008) A report on recent excavations at the shell midden of Havnø in Denmark. Mesolithic Miscellany, 19, 3–6.
Champagne A, Aoustin D, Dupont C (2012) La citadelle de Brouage et la dynamique paléoenvironnementale du marais charentais : l’apport de la malacologie et de la palynologie. In: Bilan Scientifique Régional 2011 de Poitou-Charentes., pp. 294–303. Service Régional de l’Archéologie, Poitiers.
Der Sarkissian C (2017) Ancient DNA analysis identifies marine mollusc shells as new metagenomic archives of the past. Mol. Ecol. Resour. 17, 835–853.
Gissinger B (2011) La Gripperie-Saint-Symphorien, Le Cimetière 2. In: Bilan Scientifique Régional, pp. 92–93. Direction Régionale des Affaires Culturelles (DRAC) Poitou-Charentes, Service Régional d’Archéologie (SRA), Ministère de la Culture et de la Communication, Poitiers.
Large J-M, Birocheau P (2004) Les Châtelliers du Vieil-Auzay (Vendée). Une archéologie d’un site exceptionnel de la Préhistoire récente. Groupe Vendéen d’Etudes Préhistoriques, La Roche-sur-Yon.
Le Goff L, Dupont C (2015) Consommation de coquillages du Moyen Âge au début de l’époque moderne sur le littoral charentais : les exemples de Fontdouce et de La Gripperie-Saint-Symphorien. Aquitania, 31, 373–400.
Möller P (2019a) Glacial history and palaeo-environmental change of southern Taimyr Peninsula, Arctic Russia, during the Middle and Late Pleistocene. Earth-Science Reviews. 196, 102832.
Möller P (2019b) Data set on sedimentology, palaeoecology and chronology of middle to late pleistocene deposits on the Taimyr Peninsula, Arctic Russia. Data in Brief, 25.
Rick TC (2007) The Archaeology and Historical Ecology of Late Holocene San Miguel Island. Cotsen Institute of Archaeology, University of California, Los Angeles.
Rick TC (2016) Millennial-scale sustainability of the Chesapeake Bay Native American oyster fishery. Proceedings of the National Academy of Sciences. 113, 6568–6573.

## Sheet: TableS2
Table S2. Mollusk fauna from site BBR 17 (Möller et al., 2019a, 2019b)*
Species	Biogeography class**	Number***
GASTROPODS
Euspira pallida (Broderip & Sowerby, 1829)	n/a	··
Amauropsis islandica (Gmelin, 1791)	n/a	··
Buccinum undatum (Linné, 1758)	SA	+
Neptunea despecta (Linné, 1758)	A	·
BIVALVES
Portlandia arctica (Gray, 1824)	A	···
Mytilus edulis (Linné, 1758)	SA	·
Astarte borealis (Schumacher, 1817)	A	··
Macoma balthica (Linné, 1758)	SA	·
*Extracts from Table 3 in Möller et al., 2019b. Sedimentary log for this site is found in Möller et al., 2019a, Figure 12.
**Biogeography classes: "SA", subarctic, not present in the area today (grey shaded); "A", present in several biogeographic zones, but only dominating in the Arctic; "n/a", widespread in several zones, present in the area today.
***Number of valves/fragments: •••: >20; ••: 10-19; •: 4-9; +: 1-3
REFERENCES
Möller P (2019a) Glacial history and palaeo-environmental change of southern Taimyr Peninsula, Arctic Russia, during the Middle and Late Pleistocene. Earth-Science Reviews. 196, 102832.
Möller P (2019b) Data set on sedimentology, palaeoecology and chronology of middle to late pleistocene deposits on the Taimyr Peninsula, Arctic Russia. Data in Brief, 25.

## Sheet: TableS3
Table S3. Mollusk nuclear and mitochondrial reference sequence information.
Species	Reference type	Reference / NCBI Accession Number	Size (bp)	Number of contigs
Mytilus galloprovincialis	nuclear genome	Murgarella et al., 2016	148518666	1136100
Crassostrea gigas	nuclear genome	Zhang et al., 2012	557735934	7659
Dreissena polymorpha	nuclear genome	McCartney et al., 2019	1797947340	143
Haliotis rufescens	nuclear genome	Masonbrink et al., 2019	1498703277	8371
Lymnaea stagnalis	nuclear genome	Davison et al., 2016	833229131	328378
Argopecten irridians	nuclear genome	QAU_Airr_1.1; PRJNA428789	835595382	77685
Arctica islandica	nuclear transcripts	Philipp et al., 2012	83790	76
Ruditapes decussatus	nuclear transcripts	Ghiselli et al., 2018	43706522	39459
Ruditapes philippinarum	nuclear transcripts	Milan et al., 2011; Moreira et al., 2012a; b; Ghiselli et al., 2012; Allam et al., 2014	55920234	84565
Mytilus sp.	nuclear contigs	Fraïsse et al., 2016	4300036	1269
Arctica islandica	mitochondrial genome	KF363951	18289	1
Arctica islandica	mitochondrial genome	KF363952	18267	1
Arctica islandica	mitochondrial genome	KC197241	18270	1
Pecten albicans	mitochondrial genome	KP900974	16653	1
Pecten maximus	mitochondrial genome	KP900975	17252	1
Crassostrea angulata	mitochondrial genome	EU672832	18225	1
Crassostrea angulata	mitochondrial genome	FJ841965	18408	1
Crassostrea angulata	mitochondrial genome	KJ855246	18226	1
Crassostrea angulata	mitochondrial genome	KJ855247	18226	1
Crassostrea angulata	mitochondrial genome	KJ855248	18225	1
Crassostrea angulata	mitochondrial genome	KJ855249	18226	1
Crassostrea gigas	mitochondrial genome	KJ855244	18225	1
Crassostrea gigas	mitochondrial genome	AF177226	18224	1
Crassostrea gigas	mitochondrial genome	EU672831	18225	1
Crassostrea gigas	mitochondrial genome	KJ855241	18225	1
Crassostrea gigas	mitochondrial genome	KJ855243	18225	1
Crassostrea gigas	mitochondrial genome	KJ855245	18225	1
Crassostrea gigas	mitochondrial genome	KJ855242	18224	1
Dreissena polymorpha	mitochondrial genome	KY091877	18452	1
Haliotis discus hannai	mitochondrial genome	KF724723	16886	1
Haliotis discus hannai	mitochondrial genome	KU310896	16716	1
Haliotis rufescens	mitochondrial genome	KX260956	16646	1
Haliotis tuberculata	mitochondrial genome	FJ605487	15930	1
Haliotis tuberculata	mitochondrial genome	FJ605488	15938	1
Haliotis tuberculata tuberculata	mitochondrial genome	FJ599667	16521	1
Haliotis tuberculata coccinea	mitochondrial genome	FJ605486	16358	1
Mytilus californianus	mitochondrial genome	GQ527172	16730	1
Mytilus californianus	mitochondrial genome	GQ527173	16190	1
Mytilus californianus	mitochondrial genome	JX486123	16122	1
Mytilus californianus	mitochondrial genome	JX486124	16729	1
Mytilus chilensis	mitochondrial genome	KP100300	16765	1
Mytilus chilensis	mitochondrial genome	KT966847	16748	1
Mytilus coruscus	mitochondrial genome	KJ577549	16642	1
Mytilus edulis	mitochondrial genome	AY484747	16740	1
Mytilus edulis	mitochondrial genome	DQ198225	16634	1
Mytilus edulis	mitochondrial genome	AY823623	16622	1
Mytilus edulis	mitochondrial genome	AY823624	16624	1
Mytilus edulis	mitochondrial genome	HM489873	16631	1
Mytilus edulis	mitochondrial genome	HM489874	16632	1
Mytilus edulis platensis	mitochondrial genome	KP100301	16765	1
Mytilus galloprovincialis	mitochondrial genome	AY497292	16744	1
Mytilus galloprovincialis	mitochondrial genome	AY363687	17671	1
Mytilus galloprovincialis	mitochondrial genome	FJ890849	16780	1
Mytilus galloprovincialis	mitochondrial genome	FJ890850	16639	1
Mytilus galloprovincialis	mitochondrial genome	EF434638	18518	1
Mytilus galloprovincialis	mitochondrial genome	DQ399833	19109	1
Mytilus trossulus	mitochondrial genome	AY823625	18652	1
Mytilus trossulus	mitochondrial genome	DQ198231	16781	1
Mytilus trossulus	mitochondrial genome	HM462080	18628	1
Mytilus trossulus	mitochondrial genome	HM462081	16578	1
Mytilus trossulus	mitochondrial genome	GU936625	18653	1
Mytilus trossulus	mitochondrial genome	GU936626	16578	1
Mytilus trossulus	mitochondrial genome	GU936627	17538	1
Mytilus trossulus	mitochondrial genome	KM192128	16745	1
Mytilus trossulus	mitochondrial genome	KM192133	17472	1
Mytilus trossulus	mitochondrial genome	KM192124	16593	1
Mytilus trossulus	mitochondrial genome	KM192125	17720	1
Mytilus trossulus	mitochondrial genome	KM192126	16591	1
Mytilus trossulus	mitochondrial genome	KM192127	16589	1
Mytilus trossulus	mitochondrial genome	KM192129	16632	1
Mytilus trossulus	mitochondrial genome	KM192130	17724	1
Mytilus trossulus	mitochondrial genome	KM192131	16587	1
Mytilus trossulus	mitochondrial genome	KM192132	16583	1
Mytilus trossulus	mitochondrial genome	GQ438250	16601	1
Mytilus trossulus	mitochondrial genome	KU925349	16744	1
Ruditapes decussatus	mitochondrial genome	KP089983	18995	1
Ruditapes philippinarum	mitochondrial genome	AB065374	21441	1
Ruditapes philippinarum	mitochondrial genome	AB065375	22676	1
REFERENCES
Allam B (2000a) Alterations in hemolymph and extrapallial fluid parameters in the Manila clam, Ruditapes philippinarum, challenged with the pathogen Vibrio tapetis. Journal of Invertebrate Pathology, 76, 63–69.
Davison A (2016) Formin Is Associated with Left-Right Asymmetry in the Pond Snail and the Frog. Current Biology, 26, 654–660.
Fraïsse C (2016) Local interspecies introgression is the main cause of extreme levels of intraspecific differentiation in mussels. Molecular Ecology, 25, 269–286.
Ghiselli F et al. (2012) De Novo assembly of the Manila clam Ruditapes philippinarum transcriptome provides new insights into expression bias, mitochondrial doubly uniparental inheritance and sex determination. Molecular Biology and Evolution, 29, 771–786.
Ghiselli F et al. (2018) Comparative Transcriptomics in Two Bivalve Species Offers Different Perspectives on the Evolution of Sex-Biased Genes. Genome Biology and Evolution, 10, 1389–1402.
Harney E et al. (2016) De novo assembly and annotation of the European abalone Haliotis tuberculata transcriptome. Marine Genomics, 28, 11-16.
Milan M et al. (2011) Transcriptome sequencing and microarray development for the Manila clam, Ruditapes philippinarum: genomic tools for environmental monitoring. BMC Genomics, 12, 234.
Masonbrink R (2019) An Annotated Genome for Haliotis rufescens (Red Abalone) and Resequenced Green, Pink, Pinto, Black, and White Abalone Species. Genome Biology and Evolution, 11, 431–438.
McCartney MA et al. (2019) The Genome of the Zebra Mussel, Dreissena polymorpha: A Resource for Invasive Species Research. bioRxiv, doi: https://doi.org/10.1101/696732
Moreira R et al. (2012a) Transcriptomics of in vitro immune-stimulated hemocytes from the Manila clam Ruditapes philippinarum using high-throughput sequencing. PloS One, 7, e35009.
Moreira R et al. (2012b) Gene expression analysis of clams Ruditapes philippinarum and Ruditapes decussatus following bacterial infection yields molecular insights into pathogen resistance and immunity. Developmental and Comparative Immunology, 36, 140–149.
Murgarella M et al. (2016) A First Insight into the Genome of the Filter-Feeder Mussel Mytilus galloprovincialis. PLOS ONE, 11, e0151561.
Pauletto M et al. (2014) Deep transcriptome sequencing of Pecten maximus hemocytes: a genomic resource for bivalve immunology. Fish & Shellfish Immunology, 37, 154–165.
Philipp E (2012) Gene Expression and Physiological Changes of Different Populations of the Long-Lived Bivalve Arctica islandica under Low Oxygen Conditions. PLOS ONE, 7, e44621.
Zhang G et al. (2012) The oyster genome reveals stress adaptation and complexity of shell formation. Nature, 490, 49–54.

## Sheet: TableS4
Table S4. Taxonomic identification based on Molluscan mitochondrial cytochrome c oxidase subunit I (COI-5P) gene barcodes.
Sample	Morphological identification	BOLD taxon	Number of markers in BOLD database	Taxonomic level	Sum mapped nucleotides*	%Total mapped bases	Identification
bai2	Arctica islandica	Arctica islandica	22	Species	23776	100	s
bakA		Arctica islandica	22	Species	2978	100	s
flaA		Arctica islandica	22	Species	2424	100	s
hel		Arctica islandica	22	Species	822	100	s
hel2A		Arctica islandica	22	Species	11020	100	s
onuA		Arctica islandica	22	Species	3468	100	s
ore2A		Arctica islandica	22	Species	12965	100	s
quahog1B		Arctica islandica	22	Species	34539	100	s
quahog2		Arctica islandica	22	Species	8920	100	s
ran1		Arctica islandica	22	Species	9525	100	s
ves		Arctica islandica	22	Species	4825	100	s
ves4A		Arctica islandica	22	Species	6583	100	s
BRE5p	Crassostrea gigas	Crassostrea angulata	239	Species	96660	86.8807	g
BRE5p		Crassostrea gigas	351	Species	11649	10.4704
BRE5p		Crassostrea sp. KL 2003	11	Species	2013	1.80934
BRE5p		Mollusca	23	Phylum	934	0.839505
cop1	Dreissena polymorpha	Dreissena polymorpha	97	Species	8271	98.2187	s
cop1		Myida	75	Order	150	1.78126
tys1		Dreissena polymorpha	97	Species	30672	97.8998	s
tys1		Myida	75	Order	658	2.10022
cal4	Haliotis cracherodii	Haliotis cracherodii	43	Species	6028	80.6421	s
cal4		Haliotis rufescens	94	Species	1260	16.8562
cal4		Haliotis discus hannai	63	Species	187	2.50167
cal1	Haliotis rufescens	Haliotis rufescens	94	Species	3813	63.0561	s
cal1		Provanna sp.	159	Species	1036	17.1325
cal1		Gastropoda	733	Class	606	10.0215
cal1		Reishia bronni	21	Species	296	4.89499
cal1		Chicoreus torrefactus	12	Species	296	4.89499
BRE1	Haliotis tuberculata	Haliotis tuberculata coccinea	1	Species	5794	49.319	s
BRE1		Haliotis tuberculata	26	Species	4806	40.9091
BRE1		Haliotis tuberculata tuberculata	2	Species	1148	9.77188
BRE2		Haliotis tuberculata tuberculata	2	Species	7242	47.529	s
BRE2		Haliotis tuberculata	26	Species	6407	42.049
BRE2		Haliotis tuberculata coccinea	1	Species	1588	10.422
BRE3p		Haliotis tuberculata tuberculata	2	Species	6203	50.7943	s
BRE3p		Haliotis tuberculata	26	Species	4646	38.0445
BRE3p		Haliotis tuberculata coccinea	1	Species	1155	9.45791
BRE3p		Nudibranchia	562	Subclade	208	1.70324
gue		Haliotis tuberculata tuberculata	2	Species	178	100	s
med		Haliotis tuberculata tuberculata	2	Species	6228	49.206	s
med		Haliotis tuberculata	26	Species	5123	40.4756
med		Haliotis tuberculata coccinea	1	Species	1306	10.3184
nyk1	Lymnaea stagnalis	Lymnaea stagnalis	167	Species	8805	91.9198	s
nyk1		Limax wohlberedti	2	Species	261	2.72471
nyk1		Biomphalaria pfeifferi	78	Species	178	1.85823
nyk1		Volutidae	5	Family	172	1.79559
nyk1		Bulimulus nux	7	Species	163	1.70164
hav	Mytilus sp.	Myida	75	Order	298	42.6934	g
hav		Mytilus edulis	536	Species	228	32.6648
hav		Mytilus galloprovincialis	581	Species	172	24.6418
Tx101A		Mytilus trossulus	825	Species	45751	98.5928	s
Tx101A		Mytilus	74	Genus	438	0.943884
Tx101A		Mytilida	191	Order	215	0.463322
LEFB	Pecten maximus	Myida	75	Order	443	100	-
ROSB		Pecten maximus	4	Species	37474	83.0099	s
ROSB		Pecten jacobaeus	23	Species	6129	13.5766
ROSB		Pecten albicans	2	Species	1388	3.07461
ROSB		Nudibranchia	562	Subclade	153	0.338915
Tx103	Portlandia arctica	Nuculanida	15	Order	1382	72.6986	s
Tx103		Portlandia arctica	3	Species	519	27.3014
auzay1B	Ruditapes decussatus	Ruditapes decussatus	152	Species	7896	97.856	s
auzay1B		Myida	75	Order	173	2.14401
auzay2B		Ruditapes decussatus	152	Species	3008	100	s
auzay3B		Ruditapes decussatus	152	Species	7239	93.3583	s
auzay3B		Venerida	89	Order	515	6.64173
auzay4B		Ruditapes decussatus	152	Species	3046	100	s
gripB		Ruditapes decussatus	152	Species	1924	88.1356	s
gripB		Myida	75	Order	259	11.8644
lmc1B		Ruditapes decussatus	152	Species	5100	94.2176	s
lmc1B		Venerida	89	Order	313	5.78238
lmc2B		Ruditapes decussatus	152	Species	2337	100	s
lmc3B		Ruditapes decussatus	152	Species	12127	100	s
AKKp	Ruditapes philippinarum	Ruditapes philippinarum	385	Species	14225	100	s
KORp		Ruditapes philippinarum	385	Species	93764	98.1062	s
KORp		Ruditapes	37	Genus	1235	1.29219
KORp		Venerida	89	Order	385	0.402829
KORp		Ruditapes variegatus	25	Species	190	0.198799
LAN1p		Ruditapes philippinarum	385	Species	18897	98.581	s
LAN1p		Ruditapes	37	Genus	272	1.41896
LAN2p		Ruditapes philippinarum	385	Species	29091	98.2638	s
LAN2p		Ruditapes	37	Genus	299	1.00996
LAN2p		Venerida	89	Order	215	0.726229
LAN3p		Ruditapes philippinarum	385	Species	12179	98.0912	s
LAN3p		Ruditapes	37	Genus	237	1.90883
MATp		Ruditapes philippinarum	385	Species	6458	100	s
MURp		Ruditapes decussatus	152	Species	9853	97.8742	s
MURp		Venerida	89	Order	214	2.12576
NEG		Ruditapes philippinarum	385	Species	99731	96.8761	s
NEG		Ruditapes	37	Genus	2340	2.27301
NEG		Venerida	89	Order	673	0.653734
NEG		Ruditapes variegatus	25	Species	203	0.197189
POSp		Ruditapes philippinarum	385	Species	39682	94.6816	s
POSp		Ruditapes	37	Genus	1155	2.75584
POSp		Myida	75	Order	679	1.6201
POSp		Ruditapes variegatus	25	Species	233	0.55594
POSp		Patelloida striata	3	Species	162	0.386533
SELp		Ruditapes philippinarum	385	Species	6224	100	s
nis	Venerupis corrugata	Venerupis corrugata	2	Species	283	100	s
thi		Venerupis corrugata	2	Species	2132	44.4352	s
thi		Ruditapes decussatus	152	Species	1800	37.5156
thi		Polititapes aureus	20	Species	866	18.0492
"s" indicates taxonomic identification at the species level, "g" at the genus level. "-" indicates failure of robust taxonomic identificaton at the species or genus levels.
*Considering markers covered by ≥150 bp.

## Sheet: TableS5
Table S5. Results of mapping HTS reads from Tx101A to Mytilus complete mitochondrial genome reference sequences.
Samples	Morphological identification	Barcode identification	Reference species	Accession number	Geographical origin	Reference	Sex	Recently masculinized	Reference Size (bp)	Coverage (X)
Tx101A	unidentified	Mytilus trossulus	Mytilus trossulus	AY823625.1	Atlantic Ocean, Chester Basin, Canada	Breton et al. 2006	M	yes	18652	25.4768
			Mytilus trossulus	DQ198231.2	Baltic Sea, Gulf of Gdansk, Poland	Zbawicka et al. 2007	M	n/a	16781	2.54387
			Mytilus trossulus	HM462080.1	Pacific Ocean, Howe Sound, Canada	Smietanka et al. 2010	F	n/a	18628	25.3117
			Mytilus trossulus	HM462081.1	Pacific Ocean, Howe Sound, Canada		M	no	16578	0.97718
			Mytilus trossulus	GU936625.1	Loch Etive, Scotland	Zbawicka et al. 2010	F	n/a	18653	25.7064
			Mytilus trossulus	GU936626.1	Loch Etive, Scotland		M	no	16578	1.00096
			Mytilus trossulus	GU936627.1	Loch Etive, Scotland		M	no	17538	0.403062
			Mytilus trossulus	KM192128.1	Baltic Sea, Puck Bay, Poland	Zbawicka et al. 2014	F	n/a	16745	2.46981
			Mytilus trossulus	KM192133.1	Baltic Sea, Puck Bay, Poland		F	n/a	17472	24.7248
			Mytilus trossulus	KM192124.1	Baltic Sea, Puck Bay, Poland		M	yes	16593	2.44384
			Mytilus trossulus	KM192125.1	Baltic Sea, Puck Bay, Poland		M	yes	17720	2.35256
			Mytilus trossulus	KM192126.1	Baltic Sea, Puck Bay, Poland		M	yes	16591	2.42615
			Mytilus trossulus	KM192127.1	Baltic Sea, Puck Bay, Poland		M	yes	16589	2.36663
			Mytilus trossulus	KM192129.1	Baltic Sea, Puck Bay, Poland		M	no	16632	0.646141
			Mytilus trossulus	KM192130.1	Baltic Sea, Puck Bay, Poland		M	yes	17724	2.35896
			Mytilus trossulus	KM192131.1	Baltic Sea, Puck Bay, Poland		M	yes	16587	2.45875
			Mytilus trossulus	KM192132.1	Baltic Sea, Puck Bay, Poland		M	yes	16583	2.51303
			Mytilus trossulus	GQ438250.1	n/a	n/a	M	no	16601	1.02177
			Mytilus trossulus	KU925349.1	Limfjorden, Egerslev Ron, Denmark	n/a	?	?	16744	2.56552
			Mytilus edulis	AY484747.1	n/a	Hoffman et al. 1992; Boore et al. 2004	?	?	16740	2.21622
			Mytilus edulis	DQ198225.2	Baltic Sea, Gulf of Gdansk, Poland	Zbawicka et al. 2007	M	no	16634	0.547108
			Mytilus edulis	AY823623.1	Atlantic Ocean, Chester Basin, Canada	Breton et al. 2006	M	no	16622	0.594703
			Mytilus edulis	AY823624.1	Atlantic Ocean, Chester Basin, Canada	Breton et al. 2006	M	no	16624	0.559145
			Mytilus edulis platensis	KP100301.1	Atlantic Ocean, Mar de Plata, Argentina	Gaitan-Espitia et al. 2016	F	n/a	16765	2.26198
			Mytilus edulis	HM489873.2	North Sea	Smietanka et al. 2010; Smietanka et al. 2016	M	no	16631	0.575656
			Mytilus edulis	HM489874.2	Baltic Sea		M	no	16632	0.561277
			Mytilus galloprovincialis	AY497292.2	Mediterranean Sea, Greece	Cao et al. 2004; Mizi et al. 2005	F	n/a	16744	2.46506
			Mytilus galloprovincialis	AY363687.2	Mediterranean Sea, Greece		M	no	17671	0.301113
			Mytilus galloprovincialis	FJ890849.1	Azov Sea	Burzynski et al. 2009	F	n/a	16780	2.51701
			Mytilus galloprovincialis	FJ890850.1	Mediterranean Sea, Sardinia		M	no	16639	0.402544
			Mytilus galloprovincialis	EF434638.2	Mediterranean Sea, Sardinia	Filipowicz et al. 2008	?	?	18518	2.21549
			Mytilus galloprovincialis	DQ399833.1	Mediterranean Sea, Saronikos Gulf, Greece	Venetis et al. 2007	M	yes	19109	2.20649
			Mytilus californianus	GQ527172.1	Pacific Ocean, Santa Cruz, USA	n/a	F	n/a	16730	0.625895
			Mytilus californianus	GQ527173.1	Pacific Ocean, Santa Cruz, USA	n/a	M	no	16190	0.00277435
			Mytilus californianus	JX486123.1	n/a	n/a	M	no	16122	0.00687221
			Mytilus californianus	JX486124.1	n/A	n/a	F	n/a	16729	0.629393
			Mytilus chilensis	KP100300.1	Pacific Ocean, Chile	Gaitan-Espitia et al. 2016	F	n/a	16765	2.25519
			Mytilus chilensis	KT966847.1	Pacific Ocean, Chile	Smietanka et al. 2017	F	n/a	16748	2.44964
			Mytilus coruscus	KJ577549.1	South Korea, Pacific Ocean	Lee et al. 2016	F	n/a	16642	0.491603
REFERENCES
Boore JL et al. (2004) Complete sequences of the highly rearranged molluscan mitochondrial genomes of the Scaphopod Graptacme eborea and the bivalve Mytilus edulis. Molecular Biology and Evolution, 21, 1492–1503.
Breton S et al. (2006) Comparative analysis of gender-associated complete mitochondrial genomes in marine mussels (Mytilus spp.). Genetics, 172, 1107–1119.
Burzyński A & Smietanka B (2009) Is interlineage recombination responsible for low divergence of mitochondrial nad3 genes in Mytilus galloprovincialis? Molecular Biology and Evolution, 26, 1441–1445.
Cao L et al. (2004) Evidence that the large noncoding sequence is the main control region of maternally and paternally transmitted mitochondrial genomes of the marine mussel (Mytilus spp.). Genetics, 167, 835–850.
Filipowicz M et al. (2008) Recombination in mitochondrial DNA of European mussels Mytilus. Journal of Molecular Evolution, 67, 377–388.
Gaitán-Espitia J D et al. (2016) Mitogenomics of southern hemisphere blue mussels (Bivalvia: Pteriomorphia): Insights into the evolutionary characteristics of the Mytilus edulis complex. Scientific Reports, 6, 26853.
Hoffmann RJ et al (1992) A novel mitochondrial genome organization for the blue mussel, Mytilus edulis. Genetics, 131, 397–412.
Lee YC & Lee YH (2016) The F type mitochondrial genome of hard-shelled mussel: Mytilus coruscus (Mytiloida, Mytilidae). Mitochondrial DNA. Part A, DNA Mapping, Sequencing, and Analysis, 27, 624–625.
Mizi A et al. (2005) The complete maternal and paternal mitochondrial genomes of the Mediterranean mussel Mytilus galloprovincialis: implications for the doubly uniparental inheritance mode of mtDNA. Molecular Biology and Evolution, 22, 952–967.
Smietanka B et al. (2010) Comparative genomics of marine mussels (Mytilus spp.) gender associated mtDNA: rapidly evolving atp8. Journal of Molecular Evolution, 71, 385–400.
Smietanka B et al. (2016) Complete male mitochondrial genomes of European Mytilus edulis mussels. Mitochondrial DNA. Part A, DNA Mapping, Sequencing, and Analysis, 27, 1634–1635.
Smietanka B & Burzyński A (2017) Complete female mitochondrial genome of Mytilus chilensis. Mitochondrial DNA Part B, 2, 101–102.
Venetis C et al. (2007)A mitochondrial genome with a reversed transmission route in the Mediterranean mussel Mytilus galloprovincialis. Gene, 406, 79–90.
Zbawicka et al. (2007)Complete sequences of mitochondrial genomes from the Baltic mussel Mytilus trossulus. Gene, 406, 191–198.
Zbawicka et al. (2010)Scottish Mytilus trossulus mussels retain ancestral mitochondrial DNA: complete sequences of male and female mtDNA genomes. Gene, 456, 45–53.
Zbawicka et al. (2014) Mitogenomics of recombinant mitochondrial genomes of Baltic Sea Mytilus mussels. Molecular Genetics and Genomics, 289, 1275–1287.

## Sheet: TableS6
Table S6. DNA damage estimates.
		MITOCHONDRIAL GENOMES												NUCLEAR DATA (ESTs and GENOME ASSEMBLIES)
Sample	Organism	Accession	Coverage	UniqueHits	Average length (bp)	5' C>T rates (%)	3' G>A rates (%)	Quantile	dD	dS	l	1/l - 1	dS/dD	Accession	Coverage	UniqueHits	Average length (bp)	5' C>T rates (%)	3' G>A rates (%)	Quantile	dD	dS	l	1/l - 1	dS/dD
bai2	Arctica islandica	KF363951	14.322	3200	86.3796	0.548446	1.58103	0.025	0.000390461	0.0141925	0.0527048			Arctica islandica ESTs	0.507376	553	78.5403	1.83486	3	0.025	0.00165889	0.0210707	0.139833
								0.5	0.0064782	0.0338123	0.17496	4.7156	5.2194							0.5	0.00860254	0.106876	0.546643	0.829348	12.4238
								0.975	0.0118314	0.360713	0.983662									0.975	0.0153461	0.764184	0.978781
bakA	Arctica islandica	KF363951	1.36219	299	87.0849	10.4167	7.84314	0.025	0.00442814	0.153379	0.458306			Arctica islandica ESTs	0.175832	178	93.4444	5	4.7619	0.025	0.00224027	0.021418	0.193692
								0.5	0.0108917	0.598147	0.780041	0.281983	54.9176							0.5	0.0113959	0.288244	0.787755	0.269431	25.2936
								0.975	0.0199136	0.980613	0.918147									0.975	0.0235254	0.939487	0.981507
flaA	Arctica islandica	KF363952	0.664371	147	90.4878	12.5	3.44828	0.025	0.0165177	0.0110667	0.0691954			Arctica islandica ESTs	0.0461153	46	89.5385	7.69231	14.2857	0.025	0.00794396	0.03021	0.153408
								0.5	0.0362887	0.274413	0.801828	0.24715	7.56193							0.5	0.0295351	0.429135	0.755832	0.323046	14.5297
								0.975	0.0599255	0.94313	0.988309									0.975	0.0629158	0.965166	0.976208
hel	Arctica islandica	KF363952	0.350003	138	47.5781	0	5	0.025	0.000535764	0.0112334	0.215959			Arctica islandica ESTs	0.0635995	123	41.9167	5.26316	4.7619	0.025	0.000315201	0.0154129	0.265457
								0.5	0.00536742	0.24214	0.784378	0.274895	45.1129							0.5	0.00541818	0.360639	0.833873	0.199224	66.5609
								0.975	0.0155059	0.926114	0.986855									0.975	0.0173335	0.961053	0.987608
hel2A	Arctica islandica	KF363952	5.29311	1137	89.1399	1.47783	0.966184	0.025	0.0013483	0.0131096	0.149778			Arctica islandica ESTs	0.131185	139	84.0926	6.25	3.33333	0.025	0.00060864	0.0173274	0.267114
								0.5	0.00491962	0.0733562	0.673781	0.484161	14.9109							0.5	0.00708094	0.356263	0.857884	0.165658	50.3129
								0.975	0.00820613	0.769225	0.987109									0.975	0.0185475	0.953431	0.985863
onuA	Arctica islandica	KF363951	1.89366	411	85.7143	1.40845	3.79747	0.025	0.00108525	0.0411088	0.152905			Arctica islandica ESTs	0.0728249	74	88.6296	0	0	0.025	0.00318048	0.00373514	0.0651259
								0.5	0.00887121	0.143113	0.466717	1.14263	16.1323							0.5	0.0166149	0.144056	0.806532	0.239877	8.6703
								0.975	0.0179536	0.655498	0.941489									0.975	0.0373155	0.907531	0.994194
ore2A	Arctica islandica	KF363951	7.07943	1500	95.1581	4.98084	4.31373	0.025	0.00108113	0.106522	0.373871			Arctica islandica ESTs	0.43245	422	96.1148	2.40964	10.3093	0.025	0.00127472	0.114132	0.385153
								0.5	0.00371602	0.2611	0.662092	0.510365	70.2633							0.5	0.00668133	0.421741	0.749752	0.333775	63.1223
								0.975	0.00641877	0.776292	0.874953									0.975	0.0133395	0.956244	0.915675
quahog1B	Arctica islandica	KF363951	19.7286	4269	89.3114	5.13196	4.98489	0.025	0.00892435	0.0999676	0.25193			Arctica islandica ESTs	0.370116	387	84.0792	1.31579	5.88235	0.025	0.0165353	0.00532479	0.0698038
								0.5	0.0127855	0.145306	0.389546	1.56709	11.3649							0.5	0.0261845	0.146252	0.84847	0.178592	5.58544
								0.975	0.016281	0.222076	0.557394									0.975	0.0368973	0.912959	0.994595
quahog2	Arctica islandica	KF363951	4.26743	1586	49.5203	6.38978	7.97546	0.025	0.00443511	0.174509	0.389661			Arctica islandica ESTs	0.390249	695	46.8842	3.75	3.74332	0.025	0.00412201	0.038362	0.086677
								0.5	0.00770322	0.300605	0.547837	0.825359	39.0233							0.5	0.0230862	0.147829	0.667245	0.4987	6.40336
								0.975	0.0114495	0.530086	0.710565									0.975	0.0320495	0.902894	0.980886
ran1	Arctica islandica	KF363951	5.44096	1198	87.2808	3.30189	4.5045	0.025	0.00180118	0.0602166	0.258129			Arctica islandica ESTs	0.18137	189	79.5652	2.43902	5.12821	0.025	0.000871393	0.0202942	0.13487
								0.5	0.00623791	0.187614	0.643802	0.553272	30.0764							0.5	0.0102018	0.183481	0.670206	0.492079	17.9851
								0.975	0.0102423	0.879789	0.933569									0.975	0.0228818	0.915748	0.98565
ves	Arctica islandica	KF363952	2.08963	686	55.9448	4.31655	3.7594	0.025	0.00402987	0.0574264	0.288129			Arctica islandica ESTs	0.198651	316	51.781	4.16667	2.73973	0.025	0.00654406	0.0207683	0.18924
								0.5	0.00844025	0.353213	0.830973	0.203408	41.8487							0.5	0.0141751	0.22765	0.800858	0.248661	16.0599
								0.975	0.0131206	0.952039	0.957791									0.975	0.0228363	0.909691	0.988172
ves4A	Arctica islandica	KF363951	3.12637	706	84.3194	3.05344	3.125	0.025	0.00406872	0.0358961	0.241339			Arctica islandica ESTs	0.0400167	46	70.7895	7.14286	0	0.025	0.0013838	0.0130051	0.148665
								0.5	0.00907051	0.173711	0.713015	0.402495	19.1512							0.5	0.0143675	0.300286	0.73101	0.36797	20.9004
								0.975	0.0144825	0.904725	0.972279									0.975	0.0396088	0.946289	0.986046
BRE5p	Crassostrea angulata	FJ841965	51.6109	11989	79.2424	1.40653	0.671406	0.025	0.000456406	0.0224562	0.156194			Crassostrea gigas genome	0.792305	5570267	79.3986	2.43565	2.34448	0.025	0.0116388	0.0513064	0.156541
								0.5	0.00246385	0.0311928	0.278515	2.59047	12.6602							0.5	0.0119948	0.0518291	0.163554	5.1142	4.32095
								0.975	0.00394062	0.0460695	0.457182									0.975	0.0123935	0.0523711	0.172567
cop1	Dreissena polymorpha	KY091877	5.60459	1289	82.9157	2.24719	1.35135	0.025	0.00071158	0.0342946	0.0737168			Dreissena polymorpha genome	0.09	1979940	85.2	1.516	1.372	0.025	0.00212988	0.0373577	0.107187
								0.5	0.010407	0.0685698	0.214957	3.6521	6.58884							0.5	0.00322619	0.0380234	0.120979	7.26589	11.7858
								0.975	0.0189681	0.201878	0.905729									0.975	0.00396902	0.0387396	0.132878
tys1	Dreissena polymorpha	KY091877	17.7824	4572	71.4274	2.18391	1.89125	0.025	0.00873984	0.0438601	0.411334			Dreissena polymorpha genome	0.121999	2806326	80.3	2.187	1.606	0.025	0.00784286	0.0500966	0.352747
								0.5	0.0106922	0.243834	0.882973	0.132538	22.8048							0.5	0.00797624	0.0515353	0.36573	1.73425	6.4611
								0.975	0.0124823	0.921241	0.973757									0.975	0.00809976	0.0530708	0.379185
cal1	Haliotis rufescens	KX260956	3.2581	697	88.1449	0	0.584795	0.025	0.000386717	0.00107313	0.0966987			Haliotis rufescens genome	0.131994	2486935	107.797	1.08547	0.62684	0.025	2.19274e-05	0.0175234	0.0653865
								0.5	0.00279983	0.0535386	0.904529	0.105547	19.1221							0.5	0.000441694	0.0183302	0.0712363	13.0378	41.4999
								0.975	0.0062617	0.852576	0.99889									0.975	0.0014231	0.0188802	0.0854601
cal4	Haliotis rufescens	KX260956	2.25666	467	93.8537	2.46914	6.41026	0.025	0.00175564	0.00754429	0.179986			Haliotis rufescens genome	0.117636	2077717	103.414	3.38052	2.20916	0.025	0.0164948	0.0443995	0.198865
								0.5	0.00828877	0.23025	0.86814	0.151888	27.7785							0.5	0.0170641	0.0457213	0.226939	3.40647	2.67938
								0.975	0.0164881	0.933683	0.99314									0.975	0.0175221	0.0471798	0.25492
BRE1	Haliotis tuberculata coccinea	FJ605486	6.95704	1934	58.8986	1.60428	1.85676	0.025	0.00433531	0.0268061	0.337926			Haliotis rufescens genome	0.00106506	28956	55.2977	2.14395	2.32336	0.025	0.000642114	0.0205909	0.019099
								0.5	0.0068295	0.232493	0.892336	0.120654	34.0425							0.5	0.0105204	0.0318604	0.0717624	12.9349	3.02843
								0.975	0.00941051	0.922188	0.982515									0.975	0.0166575	0.220839	0.977777
BRE2	Haliotis tuberculata tuberculata	FJ599667	9.1125	2283	65.6782	2.5463	1.65094	0.025	0.005517	0.0423681	0.423289			Haliotis rufescens genome	0.00164831	38994	63.4222	2.53589	2.24266	0.025	0.000408483	0.0232802	0.0235695
								0.5	0.00806698	0.221269	0.847337	0.180168	27.429							0.5	0.0106007	0.0332009	0.0770058	11.986	3.13194
								0.975	0.0106064	0.899659	0.972714									0.975	0.0165874	0.167736	0.955409
BRE3p	Haliotis tuberculata tuberculata	FJ599667	7.14205	1990	58.7325	1.14679	2.17865	0.025	0.00672077	0.00965609	0.0761588			Haliotis rufescens genome	0.00182445	52602	52.0494	1.705	1.68036	0.025	0.018521	6.02356e-05	0.498448
								0.5	0.0119937	0.103722	0.870065	0.149339	8.6481							0.5	0.0194175	0.00182628	0.634339	0.576444	0.0940535
								0.975	0.0151889	0.891293	0.994048									0.975	0.0203497	0.00861667	0.785795
gue	Haliotis tuberculata tuberculata	FJ599667	0.271826	80	57.0488	0	4.348	0.025	0.000823639	0.0069127	0.146624			Haliotis rufescens genome	9.47899e-05	2591	54.6443	3.10559	2.32945	0.025	0.0136909	0.00562621	0.0287526
								0.5	0.00867433	0.237544	0.822485	0.215828	27.3847							0.5	0.0207489	0.0705005	0.869174	0.150518	3.39779
								0.975	0.0238505	0.932288	0.992842									0.975	0.025498	0.852334	0.996856
med	Haliotis tuberculata tuberculata	FJ599667	6.66485	2097	52.6857	5.13393	4.49898	0.025	0.0183742	0.0896238	0.308698			Haliotis rufescens genome	0.00139423	43163	48.4329	3.62312	3.51357	0.025	0.0151876	0.0583349	0.192557
								0.5	0.0231047	0.212172	0.658126	0.519465	9.1831							0.5	0.0181582	0.0694296	0.309934	2.22649	3.82359
								0.975	0.0273853	0.852313	0.930276									0.975	0.0198792	0.0854121	0.433429
nyk1	Lymnaea stagnalis	n/a	n/a	n/a	n/a	n/a	n/a	0.025	n/a	n/a	n/a			Lymnaea stagnalis genome	0.392118	4034240	83.9034	2.29806	1.73018	0.025	0.00144254	0.0494419	0.107354
								0.5	n/a	n/a	n/a	n/a	n/a							0.5	0.00206297	0.049982	0.113038	7.84656	24.2282
								0.975	n/a	n/a	n/a									0.975	0.00271006	0.0505299	0.119423
hav	Mytilus trossulus	DQ198231	0.214681	961	45.087	23.5294	0	0.025	0.00342043	0.0598753	0.125526			Mytilus sp. contigs	0.0195322	1742	47.0949	17.4419	14.0351	0.025	0.0101444	0.28732	0.17219
								0.5	0.0305797	0.372706	0.519756	0.923981	12.188							0.5	0.0332265	0.392642	0.293007	2.41289	11.8171
								0.975	0.0606215	0.947222	0.948708									0.975	0.0488862	0.581654	0.475546
Tx101A	Mytilus trossulus	GU936625	25.7064	6214	82.8126	3.88889	7.00447	0.025	0.00687511	0.09253	0.0966348			Mytilus sp. contigs	1.98597	9956	78.4984	6.40498	3.91234	0.025	0.023292	0.117216	0.286348
								0.5	0.0239948	0.116772	0.246968	3.0491	4.86656							0.5	0.0246838	0.127614	0.331137	2.0199	5.16994
								0.975	0.0301812	0.165284	0.457475									0.975	0.0259336	0.139419	0.379789
LEFB	Pecten albicans	KP900974	0.00198162	1	n/a	n/a	n/a	0.025	n/a	n/a	n/a			Argopecten irridians genome	9.82246e-05	1843	44.3677	1.59817	1.72414	0.025	0.00447507	0.00854526	0.0424466
								0.5	n/a	n/a	n/a	n/a	n/a							0.5	0.0175415	0.0527503	0.512908	0.949668	3.00717
								0.975	n/a	n/a	n/a									0.975	0.0224809	0.720328	0.995307
ROSB	Pecten maximus	KP900975	26.9944	7024	66.6937	1.62659	1.553	0.025	0.0110097	0.0010562	0.0323084			Argopecten irridians genome	0.00092594	12984	59.4175	2.23776	1.9051	0.025	0.00121269	0.0248049	0.0304871
								0.5	0.0129792	0.0303737	0.881949	0.133852	2.34018							0.5	0.013024	0.0370455	0.132886	6.52523	2.8444
								0.975	0.0166651	0.831679	0.99864									0.975	0.0179688	0.0549985	0.839299
auzay1B	Ruditapes decussatus	KP089983	4.0605	1374	56.4113	30.8244	32.3024	0.025	0.0214497	0.813583	0.383994			Ruditapes decussatus transcripts	0.369096	263474	61.2861	0.29483	0.261078	0.025	0.030391	0.992731	0.488026
								0.5	0.0290283	0.948559	0.439449	1.27558	32.6771							0.5	0.0309091	0.998516	0.491478	1.03468	32.3049
								0.975	0.0367907	0.997938	0.48982									0.975	0.0314485	0.99996	0.494825
auzay2B	Ruditapes decussatus	KP089983	1.45419	471	58.7489	28.866	34.7826	0.025	0.015219	0.728409	0.402394			Ruditapes decussatus transcripts	0.171006	118627	63.1336	0.286933	0.250786	0.025	0.029549	0.98936	0.510957
								0.5	0.0253126	0.932944	0.487557	1.05104	36.8569							0.5	0.0302838	0.997953	0.516222	0.937153	32.9534
								0.975	0.0366122	0.996811	0.56767									0.975	0.0310453	0.999934	0.521446
auzay3B	Ruditapes decussatus	KP089983	3.90139	1254	59.1806	32.1569	34.3173	0.025	0.0152059	0.870266	0.398846			Ruditapes decussatus transcripts	0.370606	246811	65.6695	0.292372	0.250476	0.025	0.0307923	0.992942	0.503255
								0.5	0.0218962	0.971894	0.443132	1.25666	44.3864							0.5	0.0313366	0.99865	0.50683	0.97305	31.8684
								0.975	0.0291276	0.999181	0.485131									0.975	0.0318755	0.999955	0.51043
auzay4B	Ruditapes decussatus	KP089983	1.63511	564	54.5038	23.6364	28.7234	0.025	0.00551056	0.569457	0.296231			Ruditapes decussatus transcripts	0.211226	150470	61.3213	0.294741	0.262949	0.025	0.032458	0.969141	0.470763
								0.5	0.0170689	0.787624	0.395829	1.52635	46.1438							0.5	0.0332462	0.989867	0.478031	1.09191	29.7739
								0.975	0.0291035	0.983789	0.494806									0.975	0.0339999	0.99944	0.48373
gripB	Ruditapes decussatus	KP089983	0.960315	293	60.4895	22.2222	27.1186	0.025	0.0193805	0.460233	0.298977			Ruditapes decussatus transcripts	0.0844197	59426	62.1211	0.210186	0.183991	0.025	0.0351891	0.600084	0.441687
								0.5	0.0368514	0.77913	0.479657	1.08482	21.1425							0.5	0.0365684	0.635335	0.462923	1.16019	17.3739
								0.975	0.0547789	0.987393	0.631354									0.975	0.0379717	0.673672	0.484689
lmc1B	Ruditapes decussatus	KP089983	2.86371	814	67.8117	11.8421	9.60452	0.025	0.0184251	0.175331	0.201927			Ruditapes decussatus transcripts	0.202005	124359	71.0293	0.122899	0.101443	0.025	0.0304074	0.358294	0.476352
								0.5	0.0330776	0.332633	0.473389	1.11243	10.0561							0.5	0.0311951	0.381464	0.50031	0.998759	12.2283
								0.975	0.0434321	0.770245	0.769673									0.975	0.0320553	0.406567	0.524845
lmc2B	Ruditapes decussatus	KP089983	1.22439	305	76.1783	11.5942	8.69565	0.025	0.00213409	0.155845	0.215149			Ruditapes decussatus transcripts	0.112055	60439	81.0473	0.137493	0.0913949	0.025	0.0257275	0.403502	0.507386
								0.5	0.0149784	0.364501	0.507968	0.968627	24.3352							0.5	0.0268162	0.44332	0.5409	0.848772	16.5318
								0.975	0.0273261	0.912814	0.827011									0.975	0.0279356	0.48873	0.574814
lmc3B	Ruditapes decussatus	KP089983	6.22223	1711	69.7191	8.06452	10.3152	0.025	0.00933654	0.166434	0.172092			Ruditapes decussatus transcripts	0.604173	359089	73.5188	0.123225	0.0921608	0.025	0.0293151	0.314015	0.428363
								0.5	0.0236292	0.238556	0.329694	2.03311	10.0958							0.5	0.0298726	0.32501	0.442616	1.25929	10.8799
								0.975	0.0319918	0.363693	0.514022									0.975	0.0304206	0.336893	0.457004
MURp	Ruditapes decussatus	KP089983	5.07706	1730	56.2766	1.91257	1.83727	0.025	0.00556863	0.029924	0.3525			Ruditapes decussatus transcripts	0.542687	397857	59.7119	0.0201355	0.0204273	0.025	0.00906167	0.0425128	0.157872
								0.5	0.00830116	0.169382	0.843086	0.186119	20.4046							0.5	0.010406	0.0445331	0.193523	4.16735	4.27956
								0.975	0.0111305	0.887318	0.982829									0.975	0.0113108	0.0467575	0.229182
nis	Ruditapes decussatus	KP089983	0.0239685	9	40	0	4.347	0.025	0.019466	0.0104825	0.0427516			Ruditapes phillipinarum ESTs	0.020535	15950	56.2237	0.029124	0.0244868	0.025	0.00114439	0.0473942	0.0546556
								0.5	0.0973562	0.31348	0.616419	0.622274	3.21993							0.5	0.0138176	0.0583506	0.141075	6.08843	4.22293
								0.975	0.219112	0.942435	0.983495									0.975	0.0203483	0.0767616	0.451128
thi	Ruditapes decussatus	KP089983	0.0325361	12	50.1667	0	0	0.025	0.00445077	0.0127104	0.0684614			Ruditapes phillipinarum ESTs	0.0362107	27223	58.02	0.025814	0.025621	0.025	0.0038966	0.0359768	0.0366453
								0.5	0.0485297	0.335019	0.641301	0.55933	6.90339							0.5	0.0205604	0.0488649	0.350245	1.85515	2.37665
								0.975	0.145338	0.949211	0.987317									0.975	0.0226194	0.180117	0.902073
AKKp	Ruditapes philippinarum	AB065375	7.80733	2839	62.5866	1.36286	1.23894	0.025	0.012103	0.0031203	0.0501927			Ruditapes phillipinarum ESTs	0.0738863	67371	60.522	1.7796	1.65376	0.025	0.00018695	0.0448968	0.0558921
								0.5	0.0158704	0.0543334	0.884287	0.130854	3.42356							0.5	0.00358685	0.0511417	0.0738856	12.5344	14.2581
								0.975	0.019354	0.843899	0.997175									0.975	0.00959137	0.0559709	0.119822
KORp	Ruditapes philippinarum	AB065375	54.1535	18207	67.6359	1.62413	1.33259	0.025	0.00637303	0.0231586	0.038082			Ruditapes phillipinarum ESTs	1.09146	874923	68.8732	2.12359	2.00744	0.025	9.72122e-05	0.0528399	0.0533279
								0.5	0.0156624	0.0375355	0.451388	1.21539	2.39654							0.5	0.00209868	0.0569901	0.0596624	15.761	27.1553
								0.975	0.0173031	0.367915	0.980852									0.975	0.00689626	0.0592032	0.0797676
LAN1p	Ruditapes philippinarum	AB065375	10.0578	3940	57.4859	1.51724	2.08333	0.025	0.00895695	0.0107156	0.0508362			Ruditapes phillipinarum ESTs	0.360265	356166	55.7204	2.13132	2.11245	0.025	0.000268988	0.0505613	0.0605484
								0.5	0.0156728	0.0760159	0.812443	0.230855	4.85016							0.5	0.00378288	0.0542852	0.074747	12.3785	14.3502
								0.975	0.018687	0.840658	0.992628									0.975	0.00824993	0.0577111	0.103983
LAN2p	Ruditapes philippinarum	AB065375	13.6103	5169	59.8861	1.73578	2.00382	0.025	0.0147213	0.023754	0.308632			Ruditapes phillipinarum ESTs	0.453045	411953	60.6694	2.05886	2.07529	0.025	0.000613879	0.0491547	0.0619399
								0.5	0.0171404	0.114174	0.851473	0.174436	6.66107							0.5	0.00594342	0.0521477	0.0868173	10.5184	8.77402
								0.975	0.0194634	0.870973	0.992643									0.975	0.0092454	0.0562593	0.114946
LAN3p	Ruditapes philippinarum	AB065375	6.65395	2653	57.3527	2.05607	2.0073	0.025	0.0137265	0.0127414	0.220995			Ruditapes phillipinarum ESTs	0.316105	295475	59.0443	1.83122	1.92281	0.025	0.000176766	0.0449261	0.0474684
								0.5	0.0167722	0.160936	0.917609	0.0897893	9.59535							0.5	0.00297964	0.0499534	0.0577229	16.3241	16.7649
								0.975	0.0201246	0.915496	0.995289									0.975	0.00830598	0.0529518	0.0840715
MATp	Ruditapes philippinarum	AB065375	3.29542	884	63.8965	1.40187	1.19048	0.025	0.00341074	0.00317273	0.0797931			Ruditapes phillipinarum ESTs	0.0742182	62199	65.7357	2.14219	1.69433	0.025	0.00214731	0.0360295	0.0547111
								0.5	0.00788545	0.0836789	0.885207	0.12968	10.6118							0.5	0.0112985	0.0412623	0.129263	6.73616	3.65202
								0.975	0.0116328	0.871325	0.997031									0.975	0.014832	0.0478017	0.250649
NEG	Ruditapes philippinarum	AB065375	28.9933	8187	77.9763	0.742574	0.632511	0.025	0.00207532	0.00493522	0.0481639			Ruditapes phillipinarum ESTs	1.80689	1340725	73.3511	1.40475	1.32548	0.025	6.4069e-06	0.0303899	0.0972122
								0.5	0.00800306	0.0464616	0.895226	0.117036	5.80549							0.5	0.000168549	0.0311151	0.101734	8.82952	184.605
								0.975	0.00935825	0.86465	0.997369									0.975	0.000733067	0.0318565	0.109341
POSp	Ruditapes philippinarum	AB065375	18.0689	6168	63.7327	2.54669	1.66799	0.025	0.0166189	0.0179582	0.151163			Ruditapes phillipinarum ESTs	0.659402	536097	67.5077	2.02523	1.96301	0.025	0.00360503	0.040425	0.0763744
								0.5	0.0192437	0.152238	0.927813	0.077803	7.91104							0.5	0.00703941	0.0423932	0.104502	8.56917	6.02227
								0.975	0.0214853	0.918072	0.995238									0.975	0.00947987	0.0448944	0.14091
SELp	Ruditapes philippinarum	AB065375	2.67869	1070	58.0055	1.04167	2.12766	0.025	0.0121538	0.00191511	0.0520037			Ruditapes phillipinarum ESTs	0.105679	100339	57.9618	1.85594	1.98794	0.025	0.000349016	0.0355981	0.0442228
								0.5	0.0173886	0.0731113	0.875631	0.142034	4.20456							0.5	0.00629237	0.0409599	0.0725094	12.7913	6.50946
								0.975	0.0232864	0.870775	0.997432									0.975	0.012007	0.0470458	0.141582
